# Supplementary material for: Light-mediated formation and dissociation of a two-dimensional supramolecular polymer sheet: one step closer to sustainability
Source: Royal Society of Chemistry journal article supplement (doi:10.1039/c9ta01799b), 2019-01-01
Supplement: c9ta01799b1.pdf [file c9ta01799b1.pdf]

## Supporting Information

### Light-Mediated Formation and Dissociation of a Two-Dimensional Supramolecular Polymer Sheet: One Step Closer to Sustainability

Sunxian Yan<sup>a</sup>, Delong Hou<sup>b</sup>, Gaofu Yang<sup>b</sup>, Siyu Pan<sup>a</sup>, Qiuping Xie<sup>a</sup>, Qi Zeng<sup>b</sup>,

Zhonghui Wang<sup>a</sup>, Yi Chen<sup>a,c,\*</sup>, Haojun Fan<sup>b</sup>

<sup>a</sup> Key Laboratory of Leather Chemistry and Engineering of Ministry of Education,  
Sichuan University, Chengdu, 610065, P.R. China

<sup>b</sup> National Engineering Laboratory for Clean Technology of Leather Manufacture,  
Sichuan University, Chengdu, 610065, P.R. China

<sup>c</sup> Department of Chemistry, Massachusetts Institute of Technology, Cambridge,  
Massachusetts, 02139, United States

\* Corresponding author. E-mail address: chenleon@mit.edu

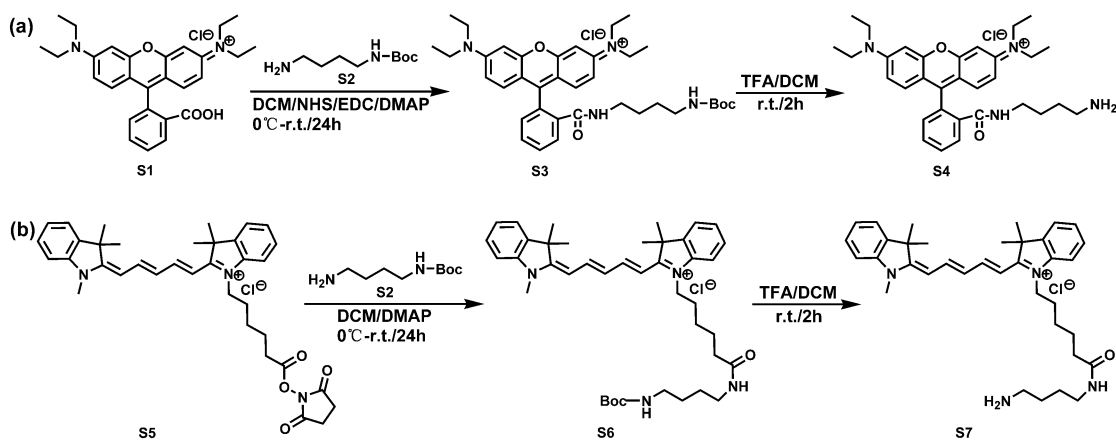

**Scheme S1.** Synthesis procedure and molecular structure of (a)

1,4-butanediamine-tagged Rhodamine B **S4** and (b) 1,4-butanediamine-tagged

Cyanine 5 **S7**.

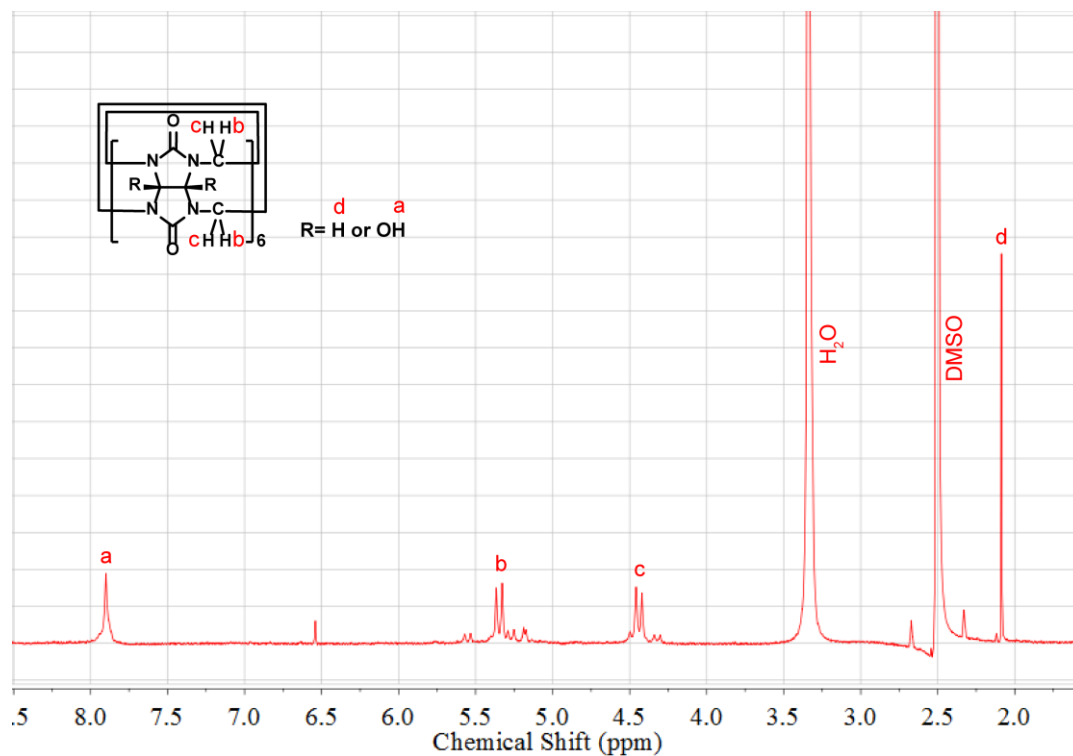

Figure S1.  $^1\text{H}$  NMR spectrum of  $\text{CB}[6]_{\text{OH}}$  in  $\text{DMSO}-d_6$ .

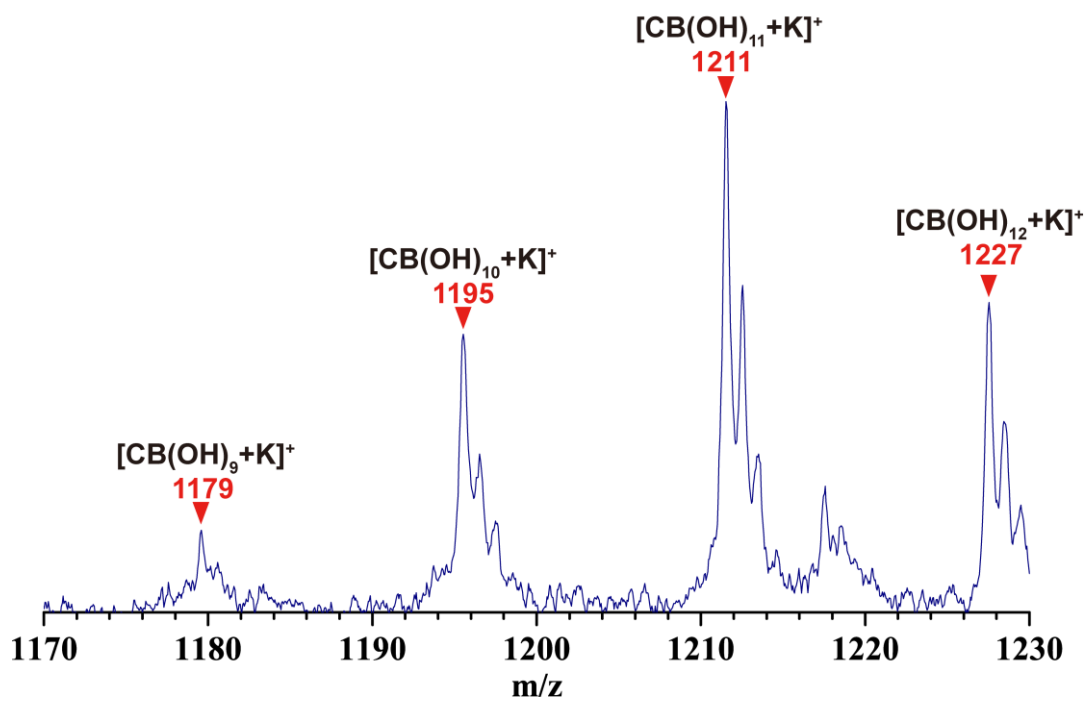

Figure S2. MALDI-TOF mass spectrum of  $\text{CB}[6]_{\text{OH}}$

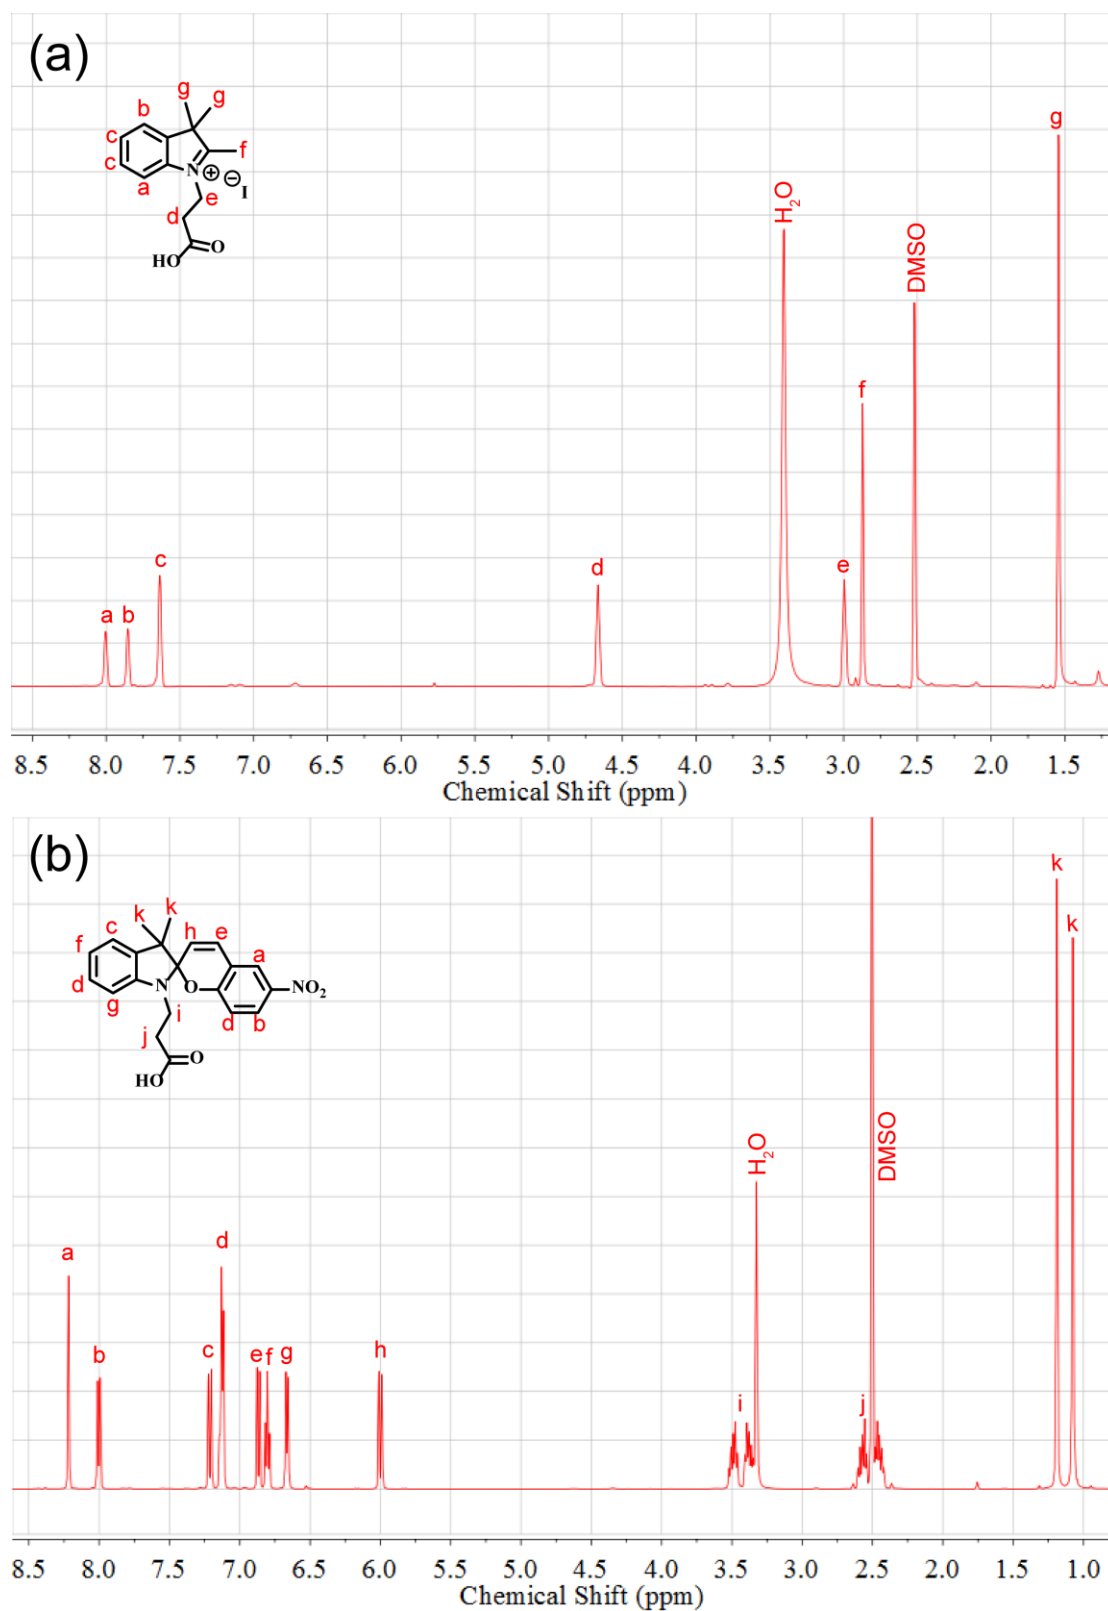

**Figure S3.**  $^1\text{H}$  NMR spectra of (a) 1-( $\beta$ -carboxyethyl)-2,3,3-trimethylindolenine iodide and (b) propionic acid-appended spiropyran in  $\text{DMSO-}d_6$ .

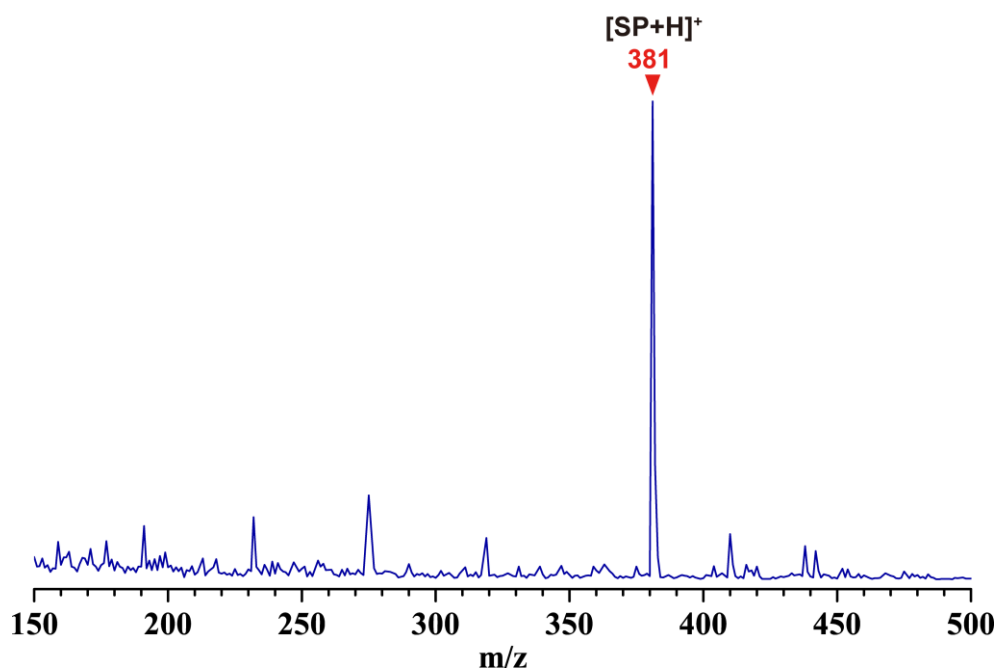

**Figure S4.** MALDI-TOF mass spectrum of propionic acid-appended spiropyran.

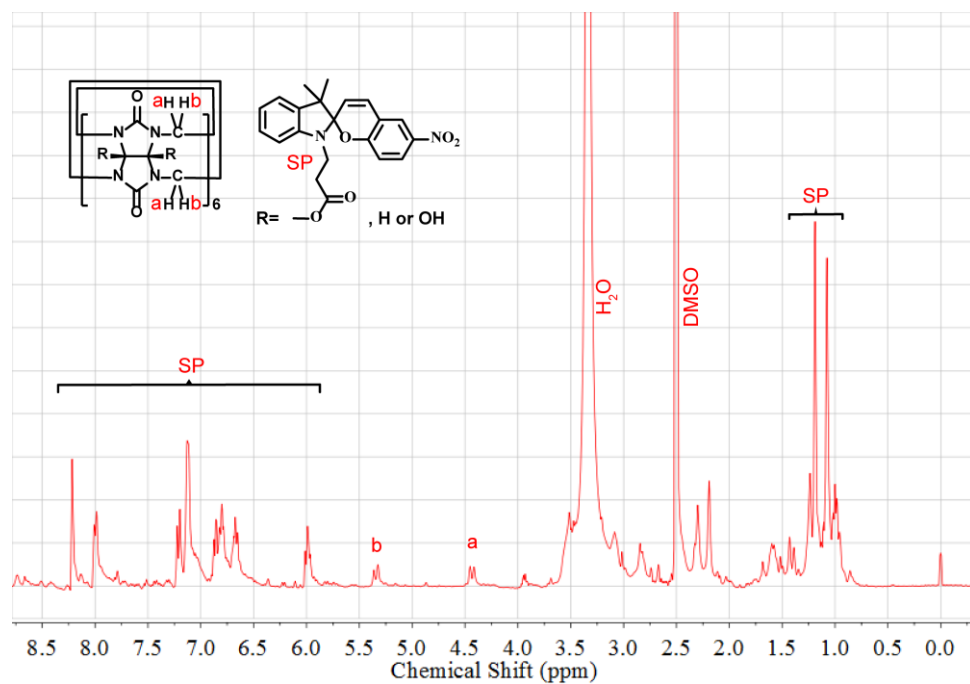

**Figure S5.** <sup>1</sup>H NMR spectrum of CB[6]<sub>SP</sub> in DMSO-*d*<sub>6</sub>.

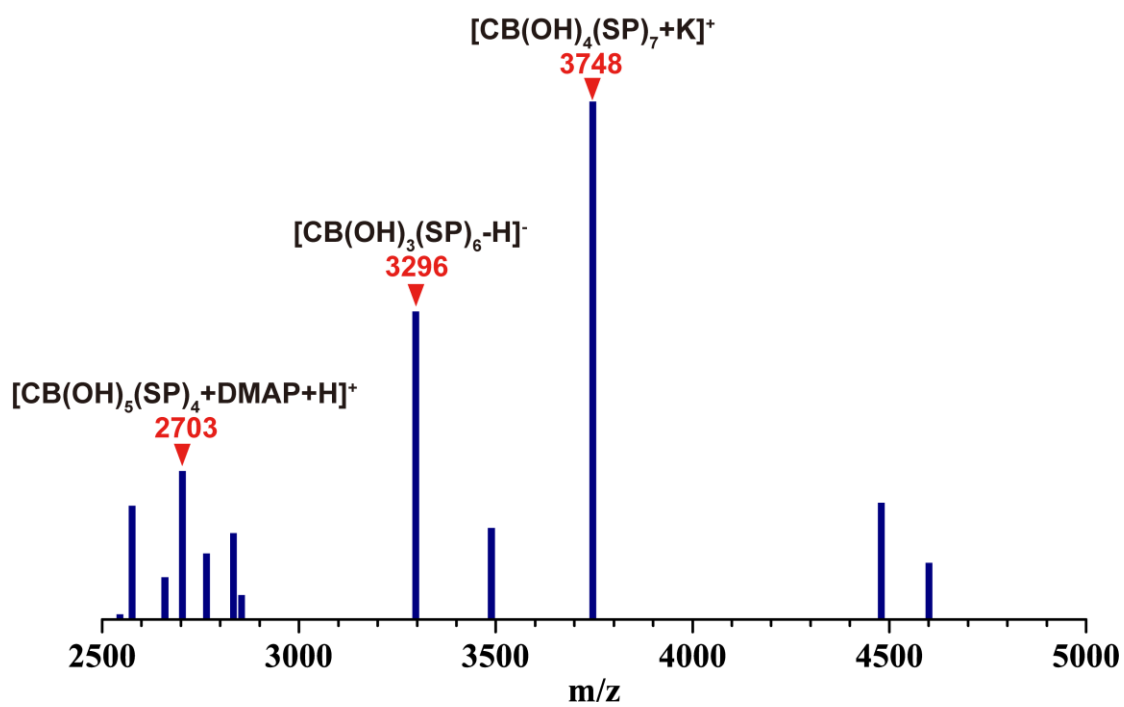

**Figure S6.** MALDI-TOF mass spectrum of CB[6]<sub>SP</sub>.

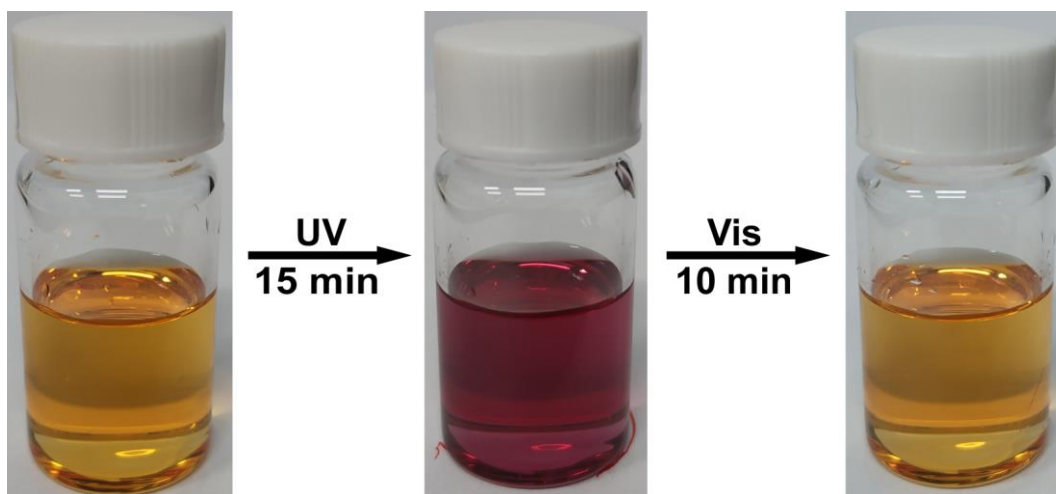

**Figure S7.** Appearance of a DMSO solution of CB[6]<sub>SP</sub> (4.0 μM) before and after irradiation with UV light ( $\lambda=365$  nm) for 15 min, followed by exposure to visible light ( $\lambda>400$  nm) for 10 min.

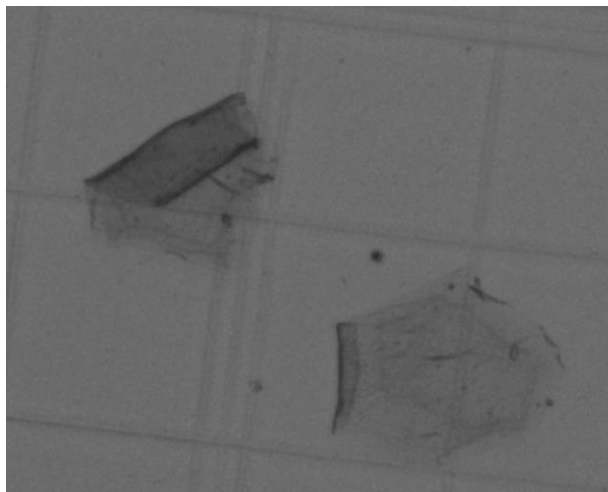

**Figure S8.** Optical microscope image of the dried 2D-PolyCB[6] shown in Figure 1 (e) after exposed to ambient light for more than six months.
